# Supplementary material for: Effects of number of training generations on genomic prediction for various traits in a layer chicken population
Source: PubMed Central journal article supplement (PMC4799631; doi:10.1186/s12711-016-0198-9), 2016-03-19

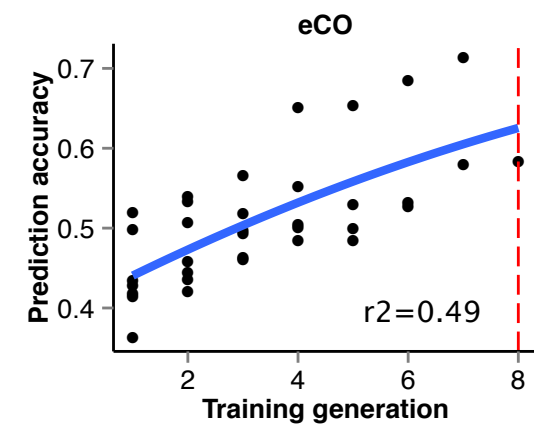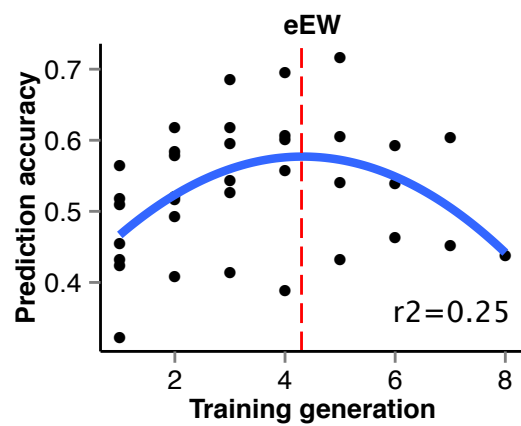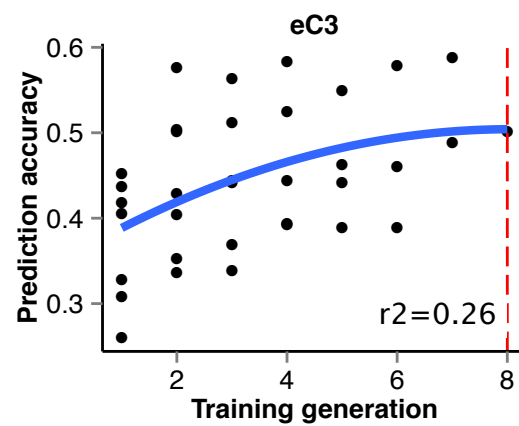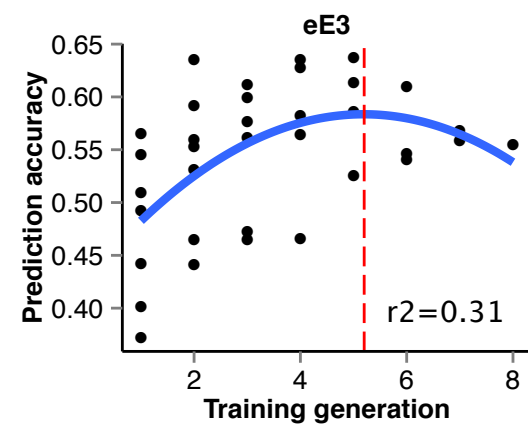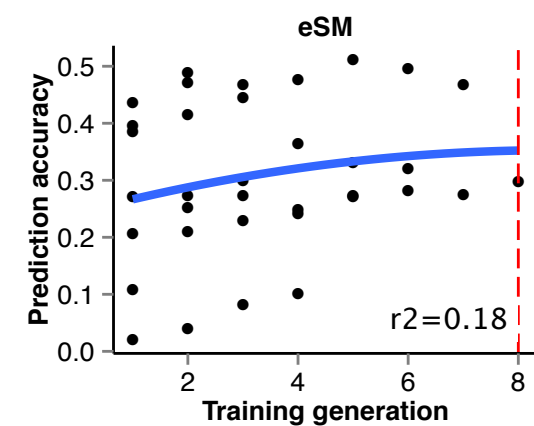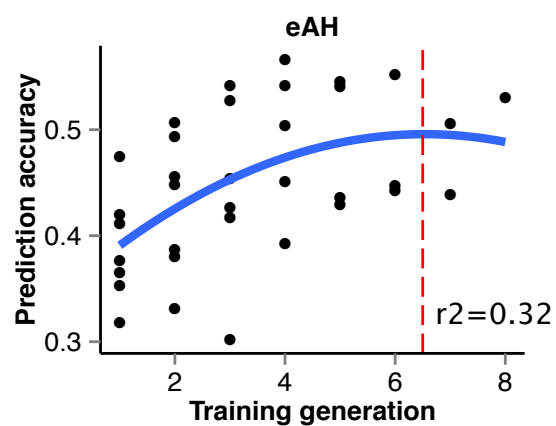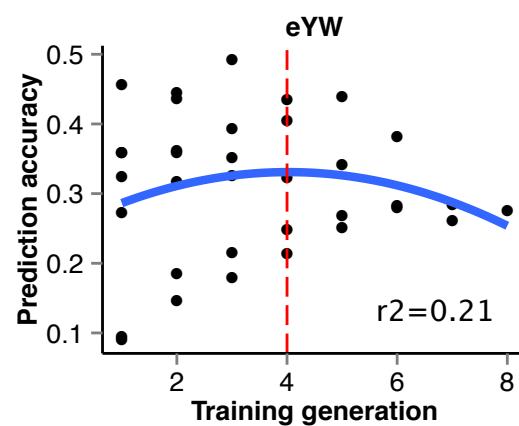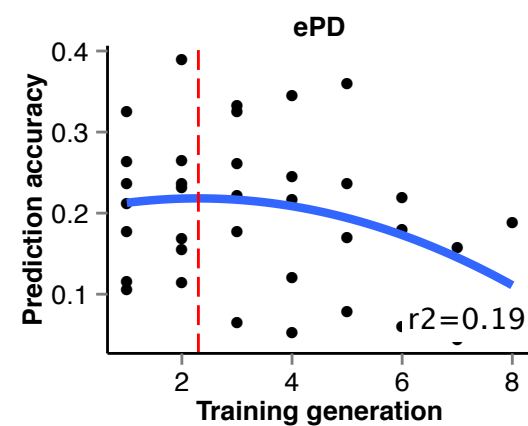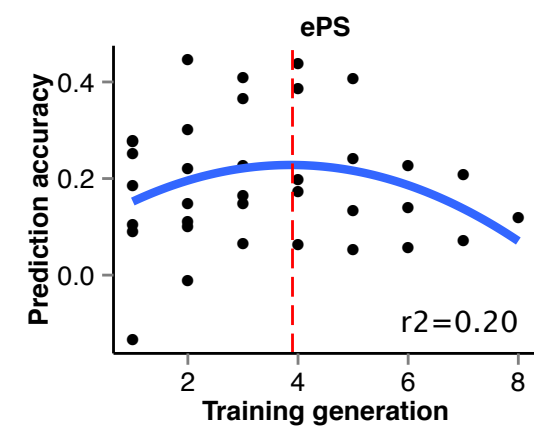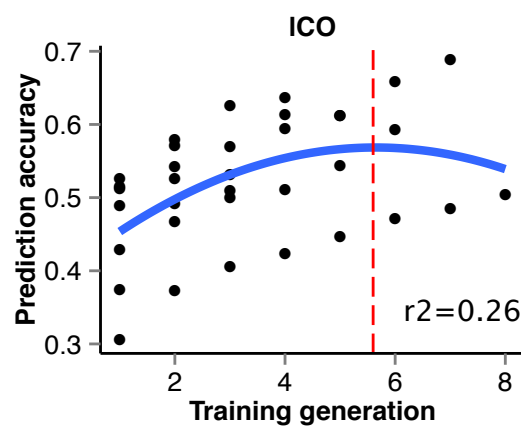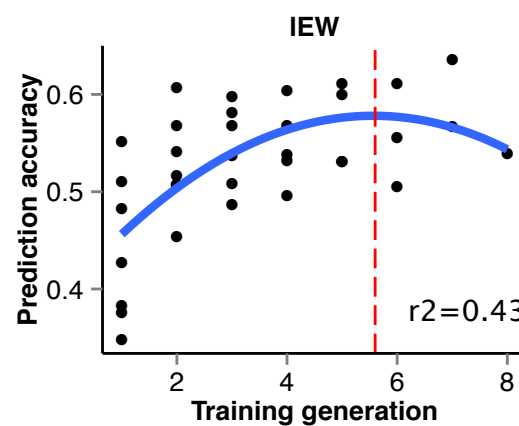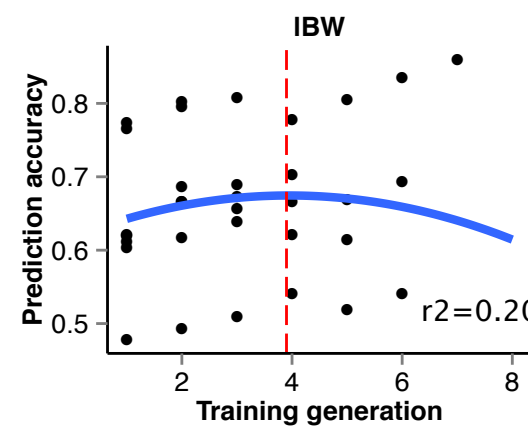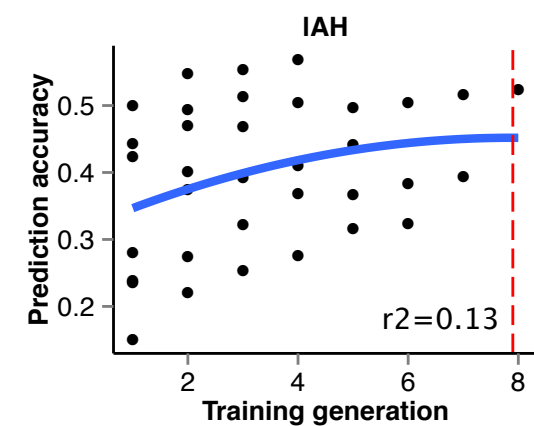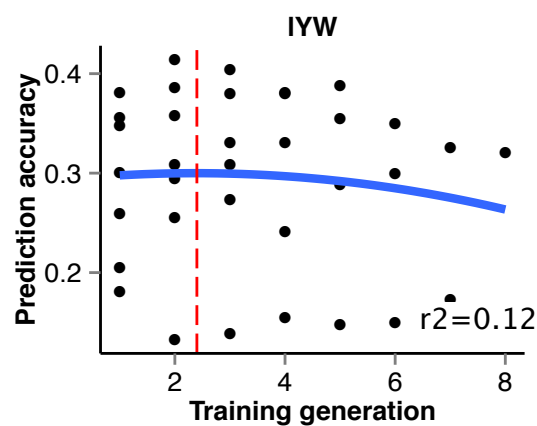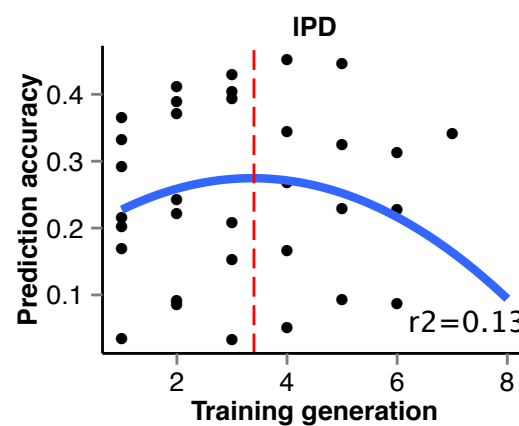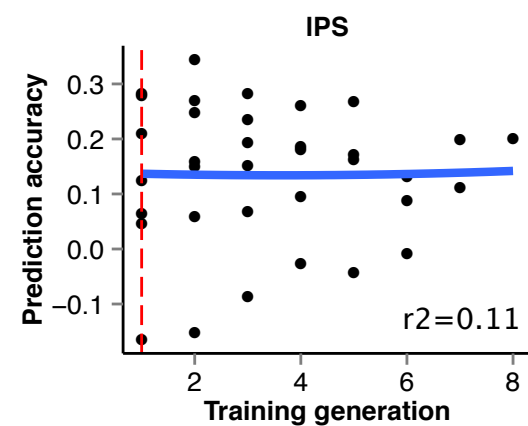

Supplement: 12711_2016_198_MOESM2_ESM.pdf [file 12711_2016_198_MOESM2_ESM.pdf]
